# Supplementary material
Source: HighWire-hosted journal article supplement (http://erj.ersjournals.com/highwire/filestream/113528/field_highwire_adjunct_files/0/ERJ-00803-2012_data_suppment_update_details.pdf)
Supplement: ERJ-00803-2012_data_suppment_update_details.pdf [file ERJ-00803-2012_data_suppment_update_details.pdf]

“Multi-ethnic reference values for spirometry for the 3–95-yr age range: the global lung function 2012 equations.” P.H. Quanjer, S. Stanojevic, T.J. Cole, X. Baur, G.L. Hall, B.H. Culver, P.L. Enright, J.L. Hankinson, M.S.M. Ip, J. Zheng and J. Stocks, the ERS Global Lung Function Initiative. *Eur Respir J* 2012; 40: 1324–1343.

The online supplement to this manuscript was modified and made available in its present form on April 22, 2013. Specifically, the heading “Lspline” in tables E5, E6 and E7 has been amended to read “L”.

A list of up to date regression coefficients is available from [www.lungfunction.org](http://www.lungfunction.org)
